# Supplementary material for: T-DNA Tagging-Based Gain-of-Function of OsHKT1;4 Reinforces Na Exclusion from Leaves and Stems but Triggers Na Toxicity in Roots of Rice Under Salt Stress
Source: PubMed Central journal article supplement (PMC5796183; doi:10.3390/ijms19010235), 2018-01-12
Supplement: ijms-19-00235-s001.pdf [file ijms-19-00235-s001.pdf]

Table S1. Primers used in this study.

| Primer name      | Seuquence (5' to 3')    | Purpose                                                               |
|------------------|-------------------------|-----------------------------------------------------------------------|
| 05753-F          | TTGCAAACCTTTTAGGCACC    | Isolation of homozygous insertion & sibling WT lines                  |
| 05753-R          | ACCACTGCTGCAGAAAACAC    | Isolation of homozygous insertion & sibling WT lines                  |
| LB_T-DNA         | ACGTCCGCAATGTGTTATTAA   | Isolation of homozygous insertion & sibling WT lines                  |
| OsHKT1;4_Q-PCR-F | GTCGAAGTTGTCAGTGCATATGG | Amplification of <i>OsHKT1;4</i> transcripts in qPCR                  |
| OsHKT1;4_Q-PCR-R | TGAGCCTCCCAAAGAACATCAC  | Amplification of <i>OsHKT1;4</i> transcripts in qPCR                  |
| OsSMT3-F         | CCCACATCAACCTCAAGGTCA   | Amplification of <i>OsSMT3</i> transcripts in qPCR (internal control) |
| OsSMT3-R         | ACGGAGCCTACGACCATCAA    | Amplification of <i>OsSMT3</i> transcripts in qPCR (internal control) |
